# Supplementary material
Source: Research Square preprint supplement (doi:10.21203/rs.3.rs-9530001/v1)
Supplement: Supplementary file 1 [file 25121eabb4e321e91cdc6db2.docx]

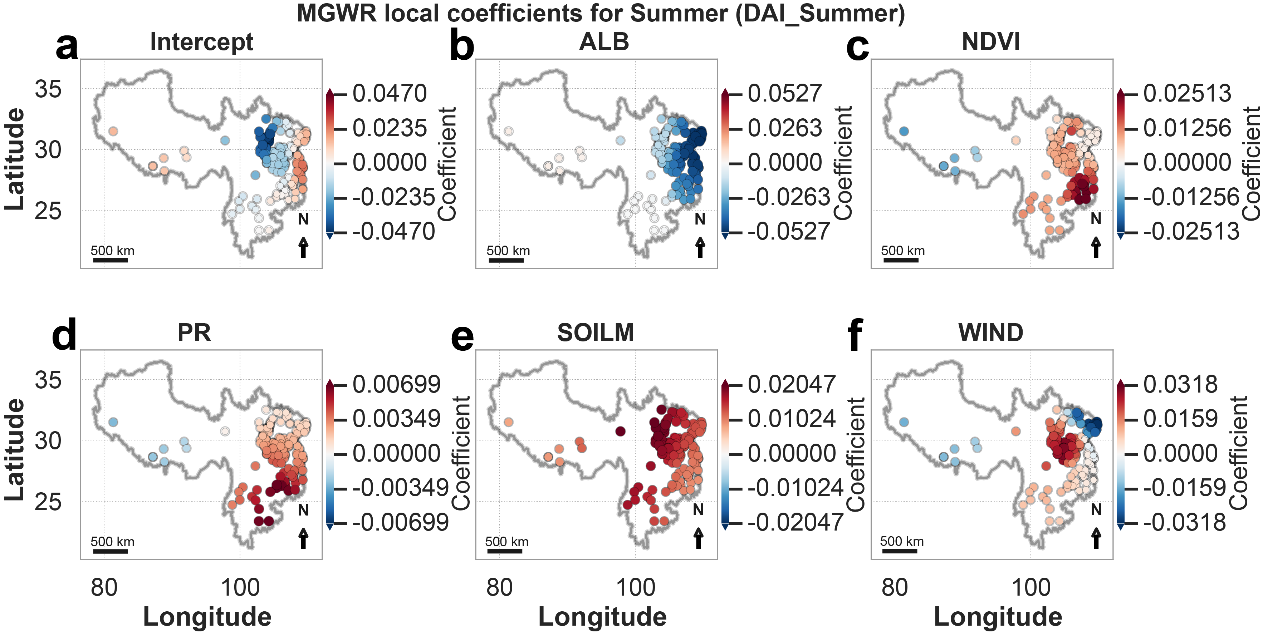


**Figure S1.** Spatial distributions of MGWR local coefficients for summertime DAI in historic towns (a shows the MGWR local intercept estimates for DAI; b–f show the MGWR local coefficients of ALB, NDVI, PR, SOILM, and WIND, respectively).


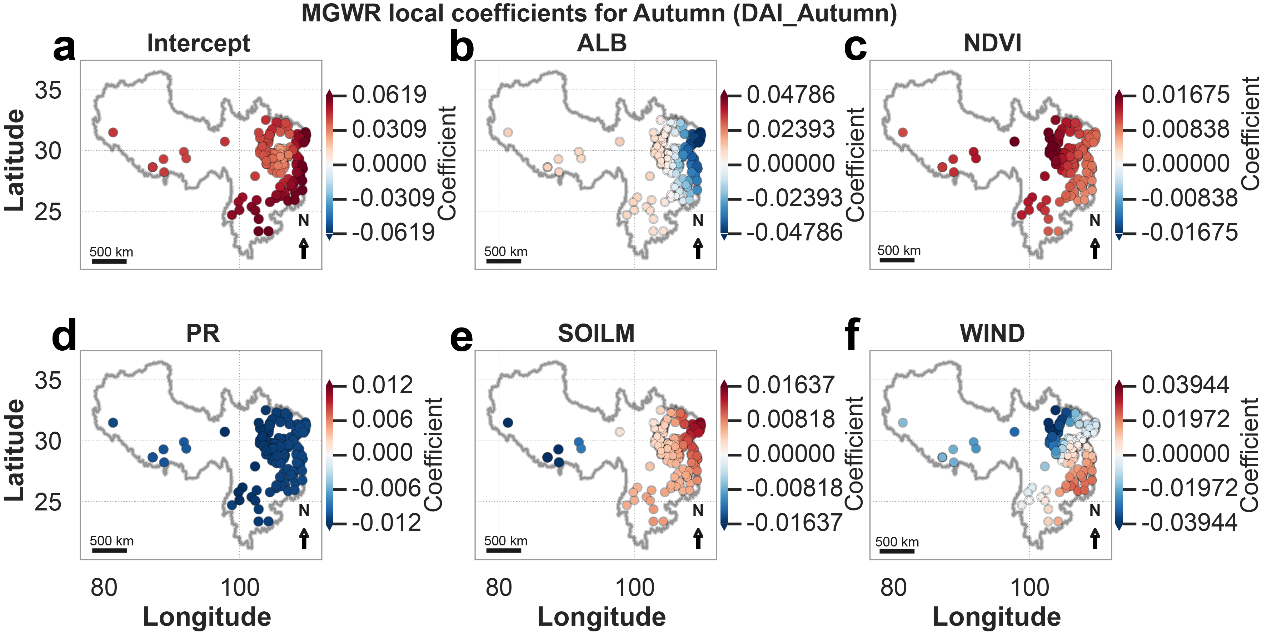


**Figure S2.** Spatial distributions of MGWR local coefficients for autumn DAI in historic towns (a shows the MGWR local intercept estimates for DAI; b–f show the MGWR local coefficients of ALB, NDVI, PR, SOILM, and WIND, respectively).


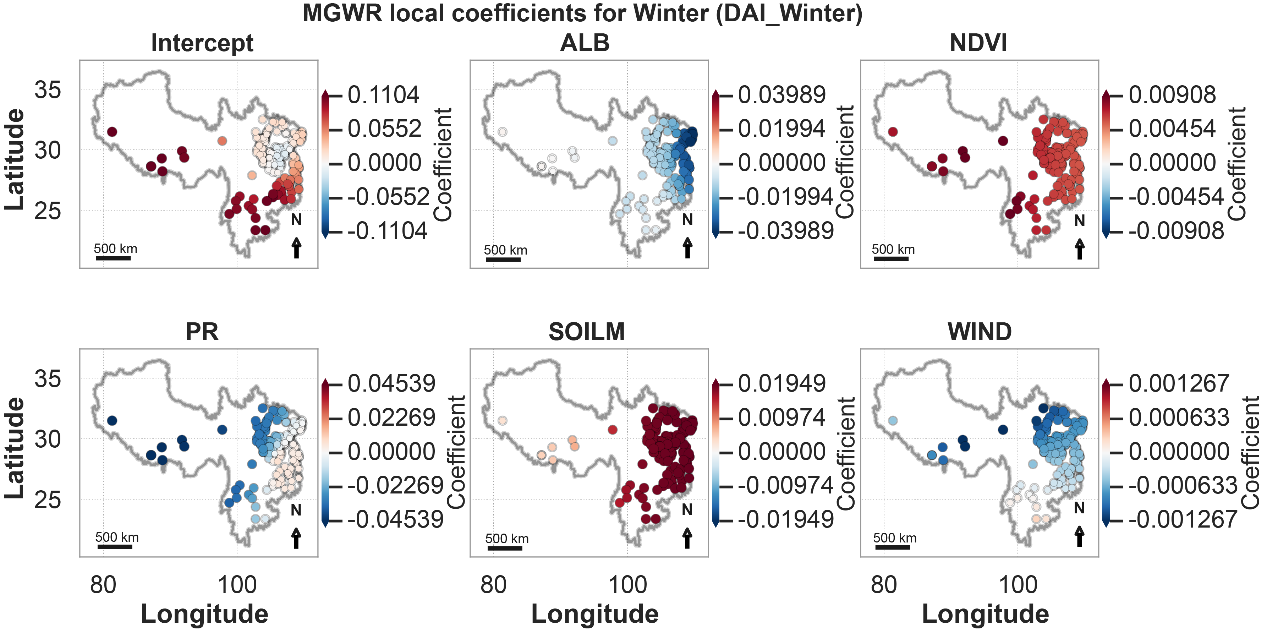


**Figure S3.** Spatial distributions of MGWR local coefficients for wintertime DAI in historic towns (a shows the MGWR local intercept estimates for DAI; b–f show the MGWR local coefficients of ALB, NDVI, PR, SOILM, and WIND, respectively).
